# Supplementary material for: The proteomic profile of the human myotendinous junction
Source: PubMed Central journal article supplement — iScience. 2022 Jan 29;25(2):103836. doi: 10.1016/j.isci.2022.103836 (PMC8851264; doi:10.1016/j.isci.2022.103836), 2022-01-29
Supplement: mmc1.pdf [file mmc1.pdf]

**iScience, Volume 25**

## **Supplemental information**

### **The proteomic profile of the human myotendinous junction**

**Anders Karlsen, Alba Gonzalez-Franquesa, Jens R. Jakobsen, Michael R. Krogsgaard, Manuel Koch, Michael Kjaer, Stefano Schiaffino, Abigail L. Mackey, and Atul S. Deshmukh**

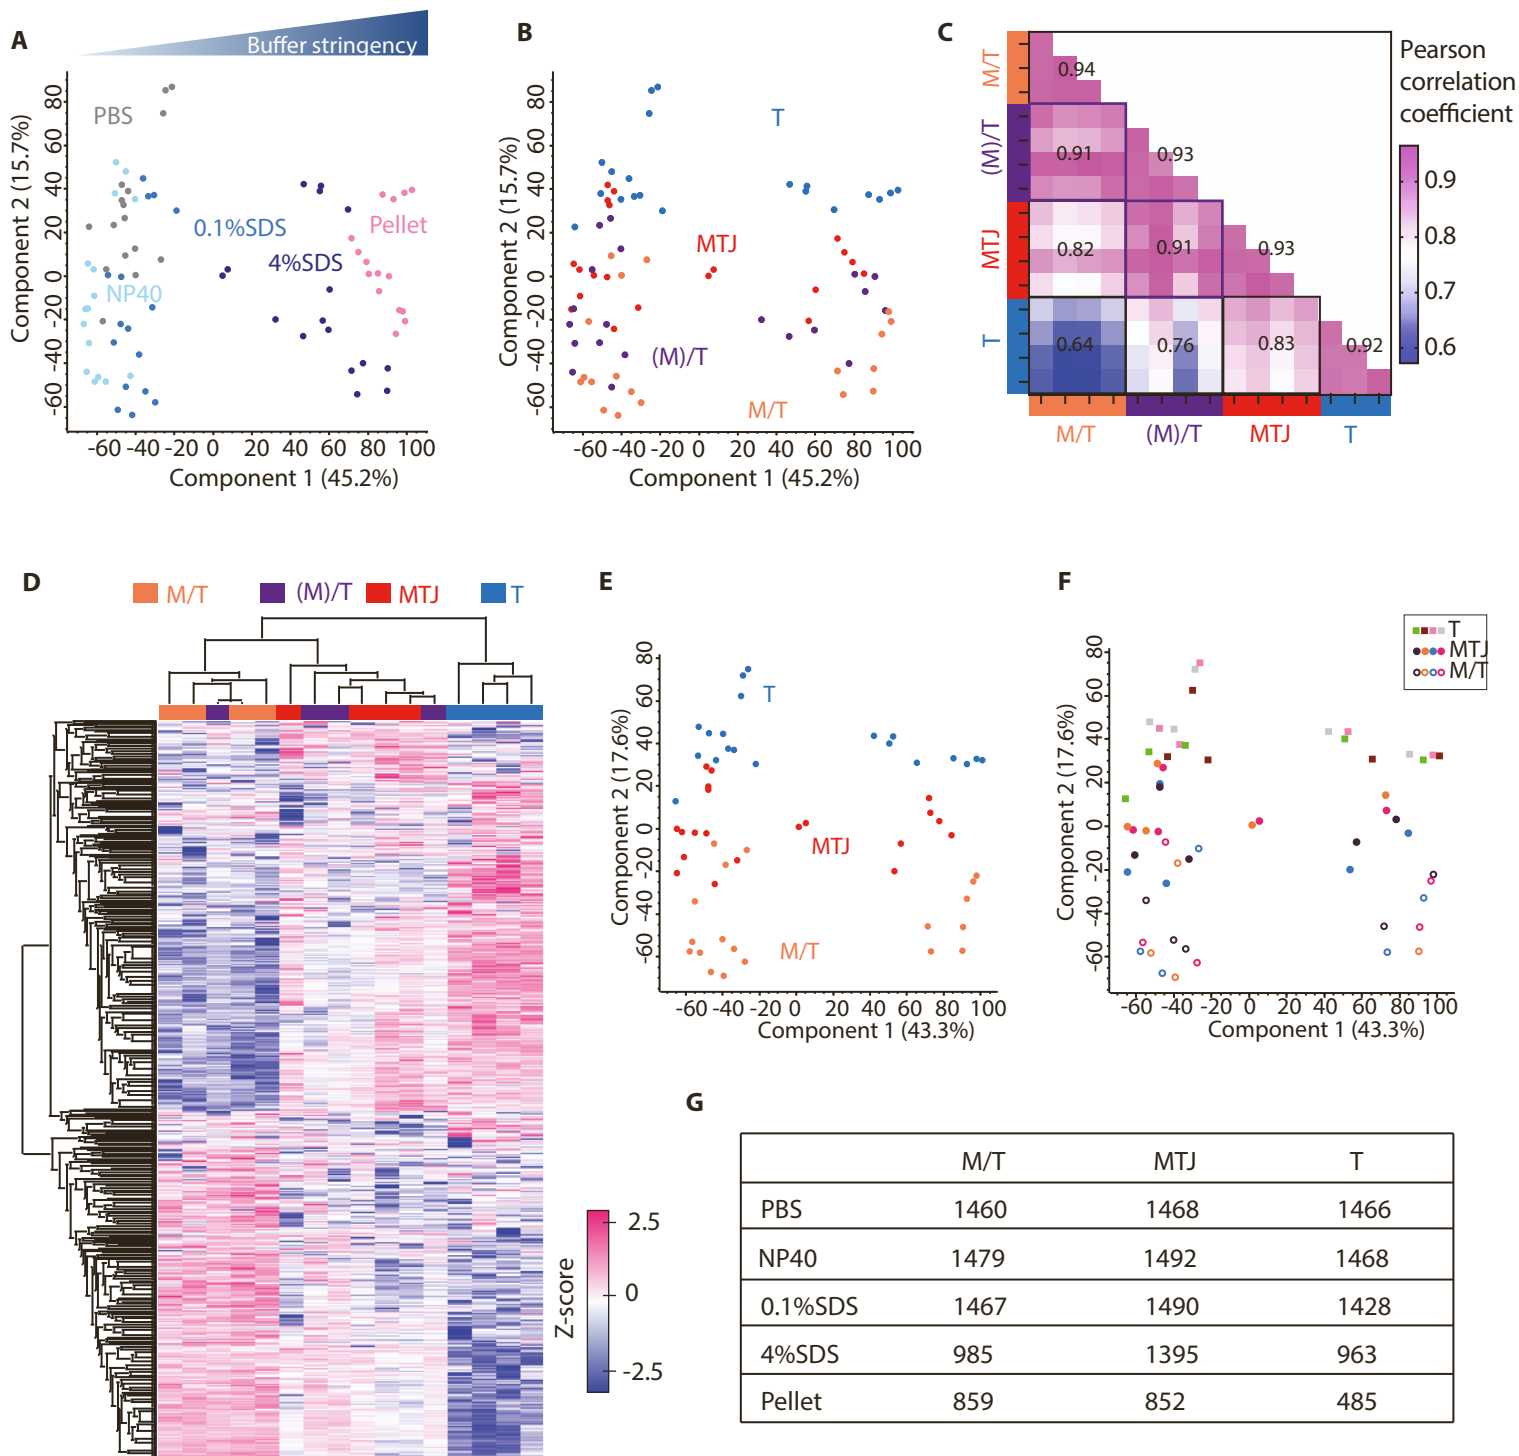

### Figure S1. Evaluation of progressive scraping and sequential extraction procedures of muscle tissue (Related to Figure 1)

(A-B) Principal component analysis (PCA) from the analysis including samples from M/T, (M)/T, MTJ and T, with all the fractions (extractions) and sample types independent from each other. Color indicates different fractions (extractions) in A and sample types in B.

(C) Pearson correlation between proteomes from the statistical comparison (fractions/extractions merged per sample type). Averaged correlations coefficients are indicated per each sample type correlation.

(D) Hierarchical clustering from the statistical comparison after filtering for all the proteins quantified in at least 3 out of 4 of the subjects in at least one sample type, including the sample type (M)/T.

(E) Principal component analysis (PCA) from the analysis including independent extractions but including only M/T, MTJ and T samples, with all the fractions (extractions) and sample types independent from each other. Color indicates different sample types.

(F) PCA from the analysis including independent extractions from samples from M/T, MTJ and T, with all the fractions (extractions) and sample types (displayed in different shapes) coloured depending on the individual donor.

(G) Number of quantified proteins in each fraction/extraction in the analysis including independent extractions. Abbreviations: M/T: muscle-tendon sample type; (M)/T: tendon sample with partially scraped muscle tissue; MTJ: myotendinous junction sample type; T: tendon sample type; PBS: phosphate-buffered saline; NP40: nonidet P-40, non-ionic detergent; SDS: sodium dodecyl sulfate.
